# Supplementary material
Source: MDPI journal article supplement (https://www.mdpi.com/2075-4701/13/5/936)
Supplement: s1 [file s1]

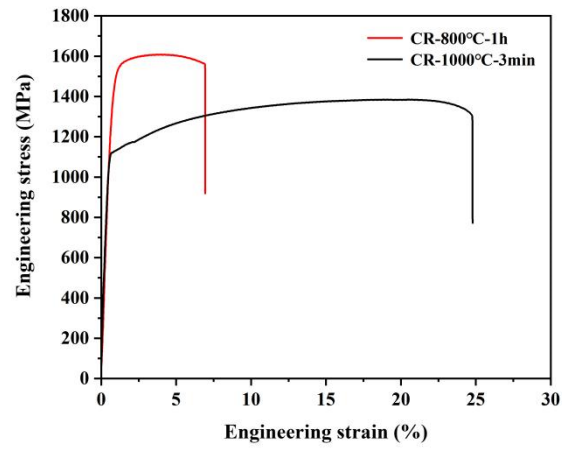

**Figure S1.** Typical engineering stress-strain curves of CoCrNi<sub>1.5</sub>Nb<sub>0.2</sub> HEAs cold-rolled + annealed at 800 °C for 1 h, and 1000 °C for 3 min, respectively.

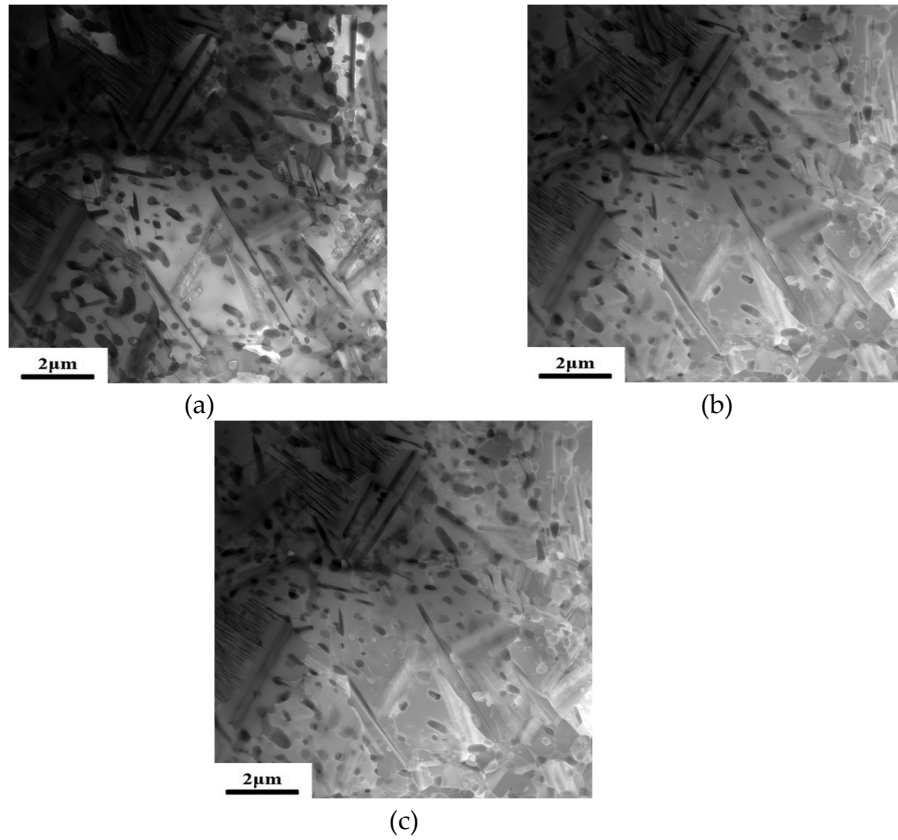

**Figure S2.** Microstructures in the CR+AN+AG CoCrNi<sub>1.5</sub>Nb<sub>0.2</sub> HEA: (a–c) STEM DF2, DF4 and HAADF micrographs, corresponding to ABF micrograph in Figure 4a.
